## Correction

# Correction: *Trypanosoma cruzi* Survival following Cold Storage: Possible Implications for Tissue Banking

The PLOS ONE Staff

Table 1 does not appear in the published article. Please view Table 1 here as Figure S1 of this correction.

## Supporting Information

**Figure S1 Storage conditions.**  
(DOCX)

## Reference

1. Martin DL, Goodhew B, Czaicki N, Foster K, Rajbhandary S, et al. (2014) *Trypanosoma cruzi* Survival following Cold Storage: Possible Implications for Tissue Banking. PLoS ONE 9(4): e95398. doi:10.1371/journal.pone.0095398

**Citation:** The PLOS ONE Staff (2014) Correction: *Trypanosoma cruzi* Survival following Cold Storage: Possible Implications for Tissue Banking. PLoS ONE 9(12): e114783. doi:10.1371/journal.pone.0114783

**Published:** December 3, 2014

**Copyright:** © 2014 The PLOS ONE Staff. This is an open-access article distributed under the terms of the Creative Commons Attribution License, which permits unrestricted use, distribution, and reproduction in any medium, provided the original author and source are credited.
